# Supplementary material for: Characterization of dipyridamole as a novel ferroptosis inhibitor and its therapeutic potential in acute respiratory distress syndrome management
Source: PubMed Central journal article supplement (PMC11610143; doi:10.7150/thno.102318), 2024-10-21
Supplement: thnov14p6947s1.pdf [file thnov14p6947s1.pdf]

Supplementary Materials for

**Characterization of dipyridamole as a novel ferroptosis inhibitor and its therapeutic potential in acute respiratory distress syndrome management**

Xu Chen, Jiapan Shen, Xueqin Jiang, Min Pan, Shuang Chang, Juanjuan Li, Lei Wang, Manli Miao, Xiaoxia Feng, Ling Zhang, Guoqing Shu, Wenjian Liu, Fangzhou Xu, Wentao Zhang, Zhao Ding, Huaiyuan Zong, Weiwei Liu, Dapeng Li, Biao Chen, Min Shao, Guanghe Fei\*, Xiaojun Zha\*, Xiaoyun Fan\*

**Correspondence to:** Xiaoyun Fan ([xiaoyunfan@ahmu.edu.cn](mailto:xiaoyunfan@ahmu.edu.cn)), Xiaojun Zha ([zhaxiaojunpumc@gmail.com](mailto:zhaxiaojunpumc@gmail.com)), and Guanghe Fei ([guanghefei@126.com](mailto:guanghefei@126.com)).

**This PDF file includes:**

Figure S1 to S11

Table S1 to S11

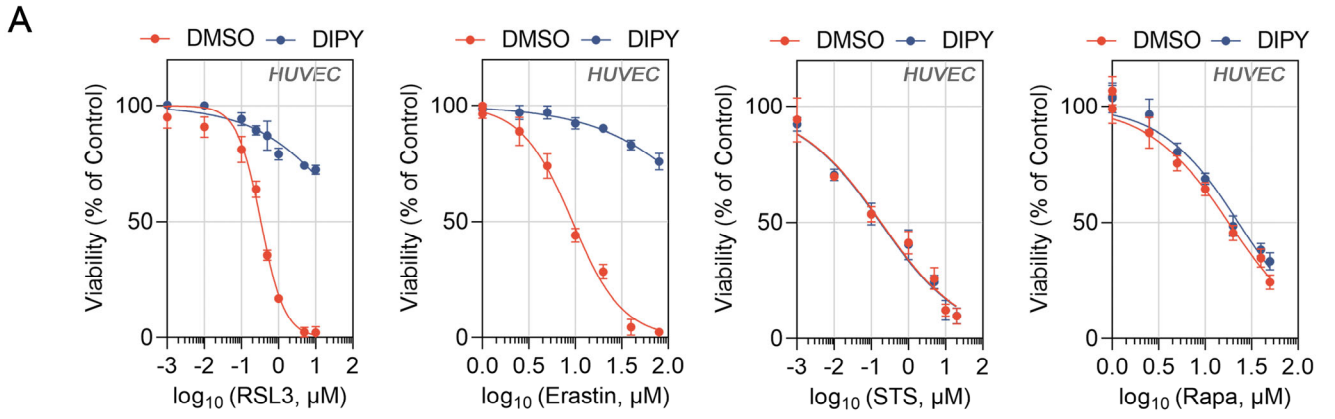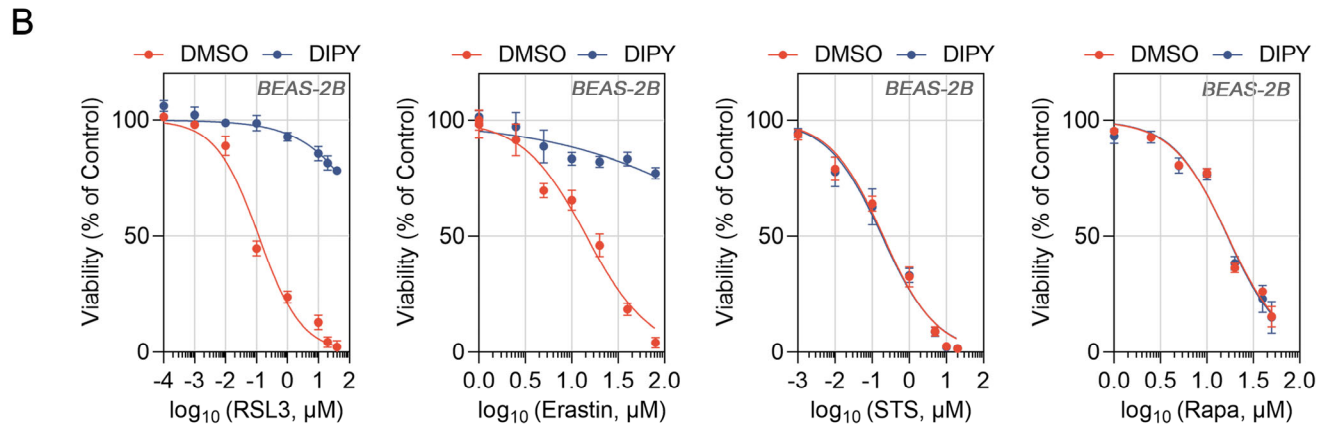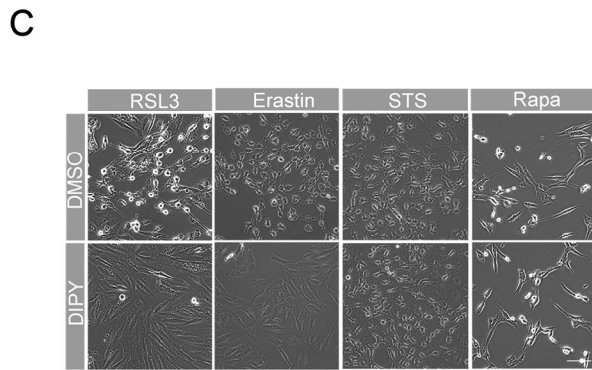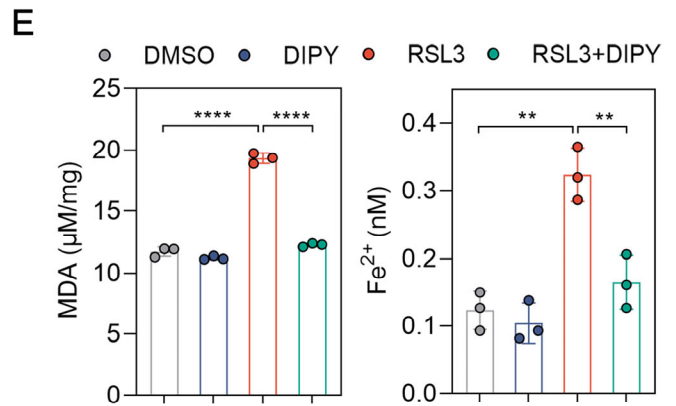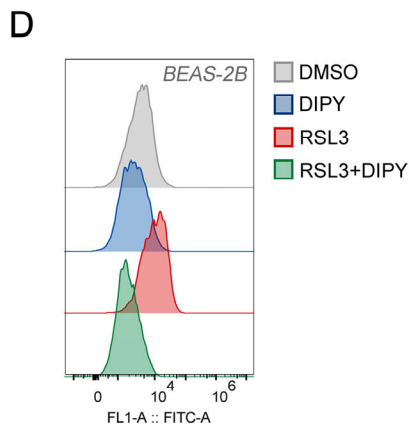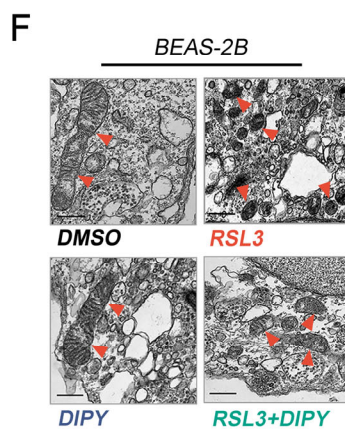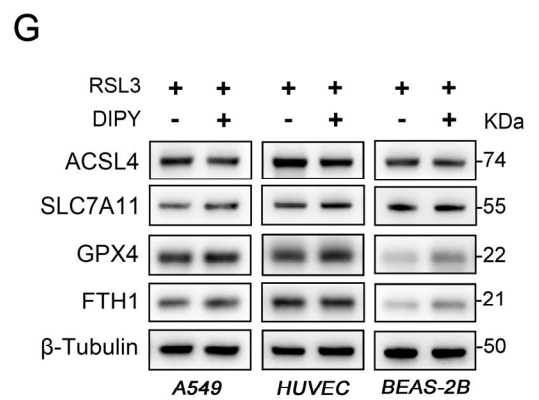

**Figure. S1 Validation of the specific anti-ferroptosis effect of DIPY in lung epithelial and endothelial cells.**

(A-C) HUVEC (A) and BEAS-2B (B) cells were treated with RSL3, Erastin, STS, and Rapa with or without DIPY (5  $\mu$ M for HUVEC; 10  $\mu$ M for BEAS-2B) for indicated times (RSL3 and Erastin for 8 h; STS for 6 h; Rapa for 48 h). CCK-8 assay for cell viability. Representative phase-contrast images of BEAS-2B cells (C). Scale bar, 100  $\mu$ m. (D-F) BEAS-2B cells were treated with RSL3 (1  $\mu$ M), DIPY (10  $\mu$ M), or RSL3 (1  $\mu$ M) plus DIPY (10  $\mu$ M) for 8 h. L-ROS levels were measured (D). MDA contents and Fe<sup>2+</sup> levels were determined (E). Representative TEM images of cells were presented, with red arrows indicating mitochondria (F). The expression of ferroptosis-related markers was detected by western blot (G). Scale bar, 500 nm. Results are shown as mean  $\pm$  SD from 3 independent experiments. Statistical significance is indicated as \*\* $P < 0.01$ ; \*\*\*\* $P < 0.0001$ .

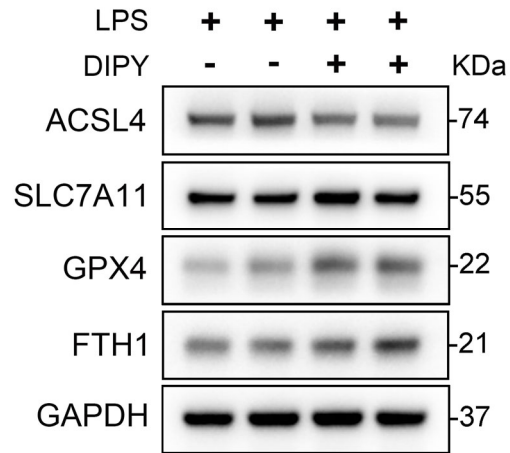

**Figure. S2 The expression of ferroptosis marker proteins in LPS-induced ARDS mouse model.**

Western blot assays examined the expression of ferroptosis marker proteins (ACSL4, SLC7A11, GPX4, and FTH1) in LPS-induced acute lung injury mouse models with or without DIPY treatment as shown in Figure 2 (n = 6 per group).

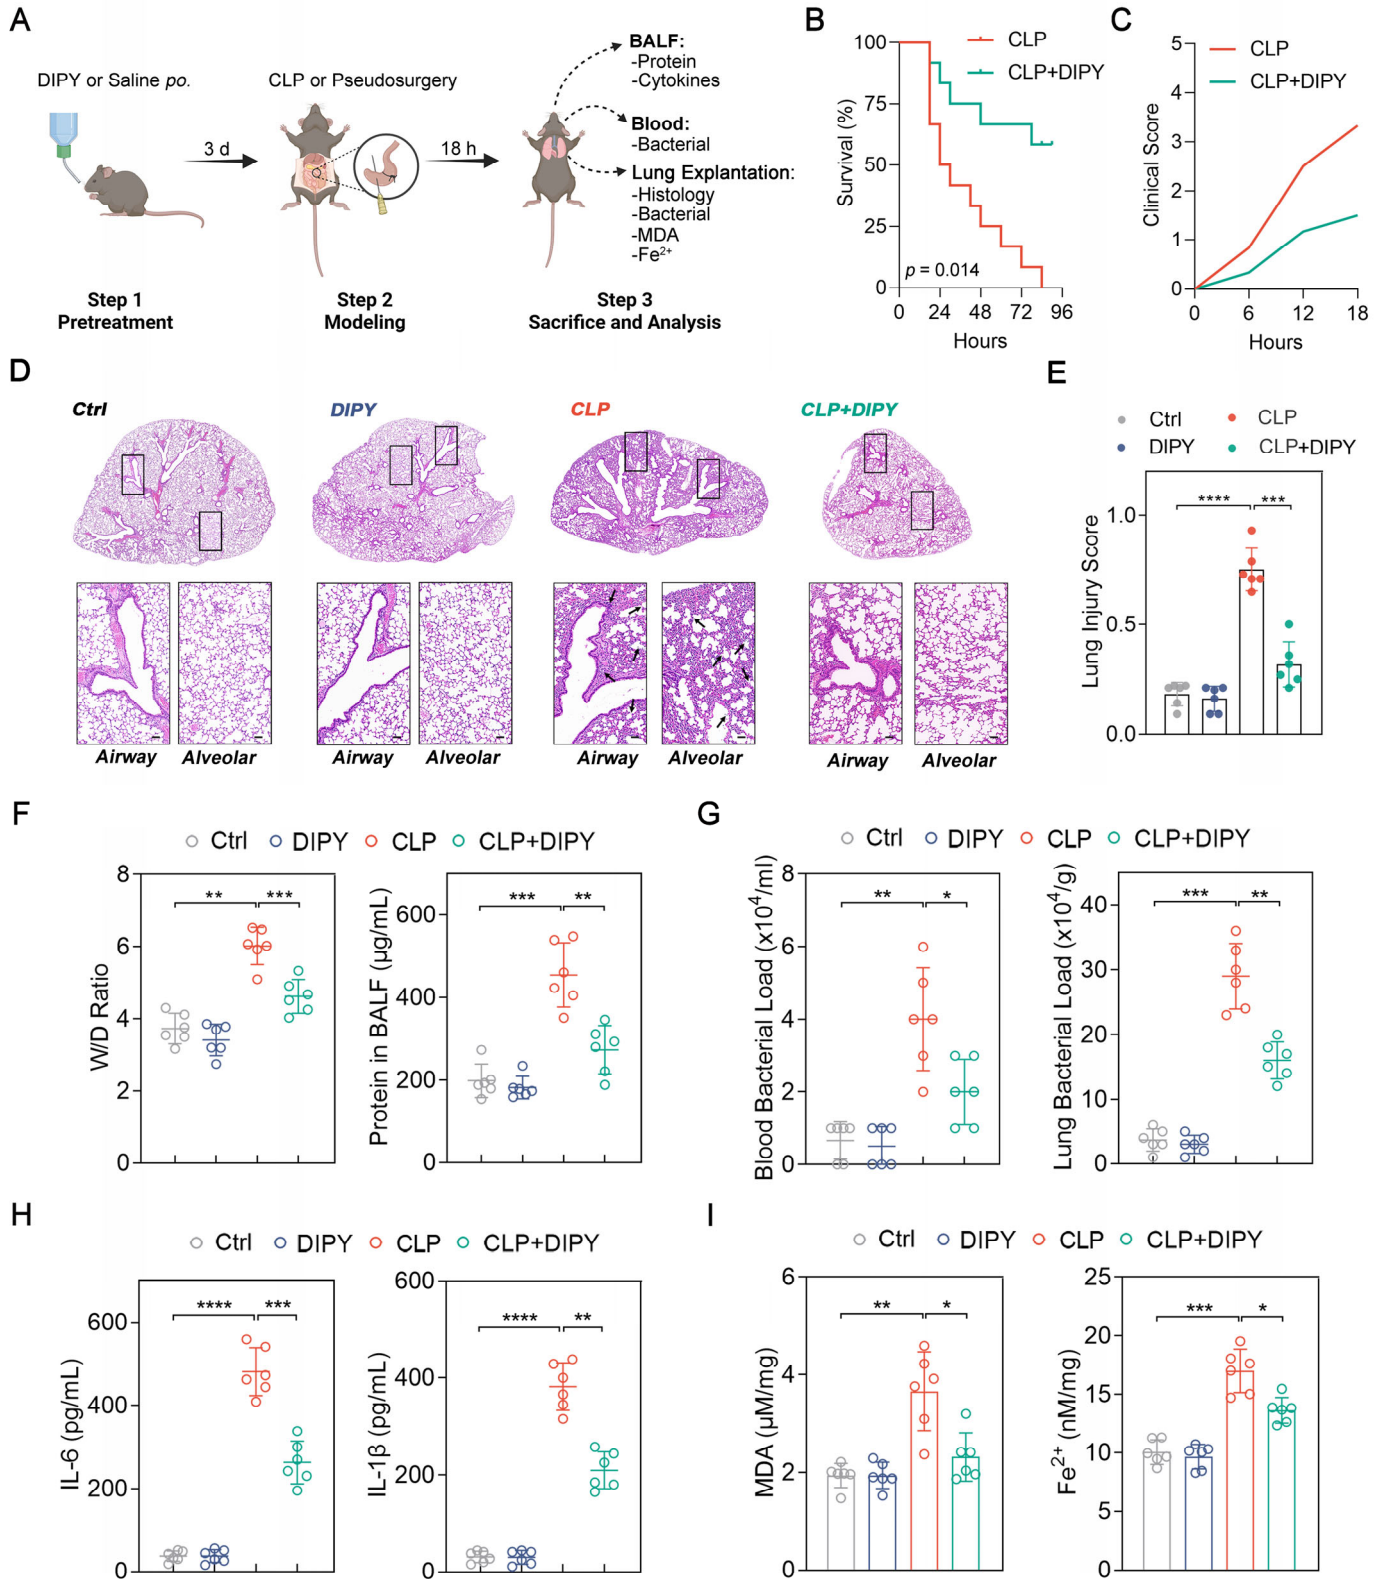

**Figure. S3 DIPY inhibits ferroptosis in CLP-induced sepsis mouse model.**

(A) Scheme of the experimental procedure for the CLP-induced sepsis mouse model. DIPY pretreatment (10 mg/kg, orally) was administered 3 days before the CLP surgery. Mice underwent either mild CLP (ligated ~50% cecum) or lethal CLP (ligated ~75% cecum). After 18 h, the BALF and lung samples from mild CLP mice were collected and analyzed. (B) Percent survival after lethal CLP is shown (n = 12 per group). (C-I) Mild CLP-challenged sepsis mice were pretreated with or without DIPY (n = 6 per group). Clinical score of mice (C). Representative images of H&E-stained lung sections, with black arrows indicating infiltrating inflammatory cells, interstitial edema, and alveolar wall thickening (D). Scale bar, 50  $\mu$ m. Lung injury scores (E). Measurements of lung wet/dry ratio and total protein in BALF (F). Bacterial load in the blood and lungs (G). ELISA analysis of IL-6 and IL-1 $\beta$  levels in BALF (H). MDA contents and Fe<sup>2+</sup> levels in mouse lung tissues (I). Results are shown as mean  $\pm$  SD. Statistical significance is indicated as \* $P$  < 0.05; \*\* $P$  < 0.01; \*\*\* $P$  < 0.001; \*\*\*\* $P$  < 0.0001.

A

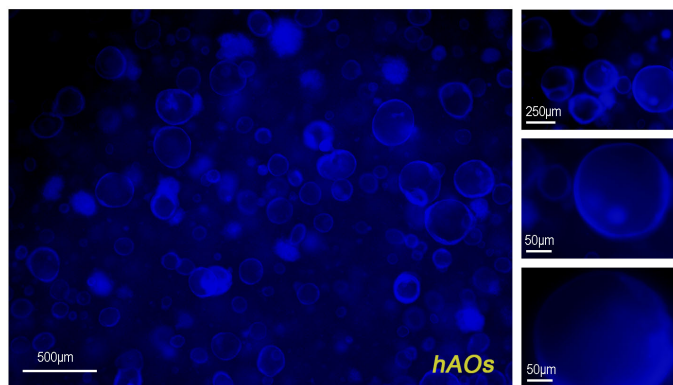

B

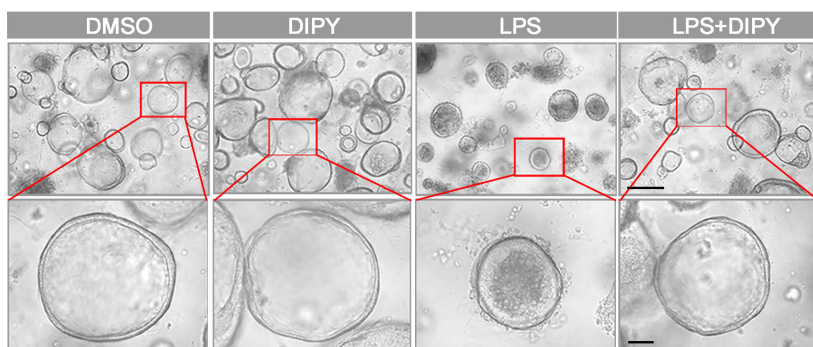

C

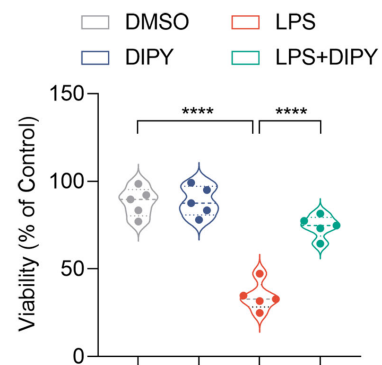

D

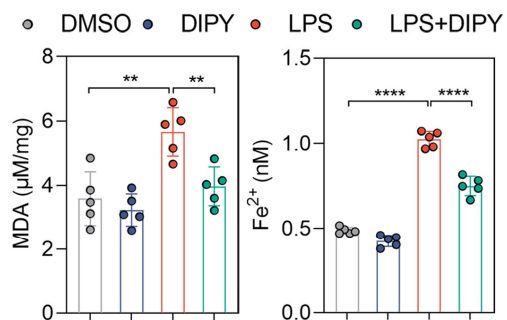

E

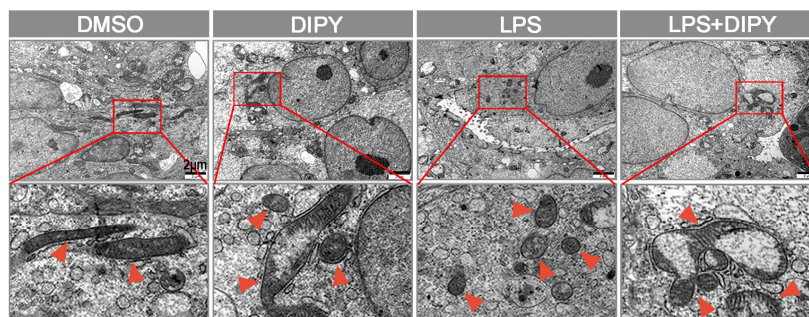

**Figure. S4 DIPY inhibited LPS-induced ferroptosis in hAOs.**

(A) hAOs were treated with DIPY (20  $\mu$ M) for 24 h and observed by confocal microscopy with excitation at 405 nm. (B-E) The hAOs were treated with LPS (100  $\mu$ g/mL), DIPY (20  $\mu$ M), and LPS (100  $\mu$ g/mL) with DIPY (20  $\mu$ M) for 24 h (n = 5 per group). Morphological changes of hAOs after the indicated treatment (B). Scale bar, 250  $\mu$ m (upper panel) and 50  $\mu$ m (lower panel). Assessment of organoid viability (C). MDA contents and Fe<sup>2+</sup> levels were measured (D). TEM analyses illustrating representative mitochondria in the hAOs with red arrows indicate mitochondria (E). Scale bar, 2  $\mu$ m. Results are shown as mean  $\pm$  SD. Statistical significance is indicated as \*\* $P < 0.01$ ; \*\*\*\* $P < 0.0001$ .



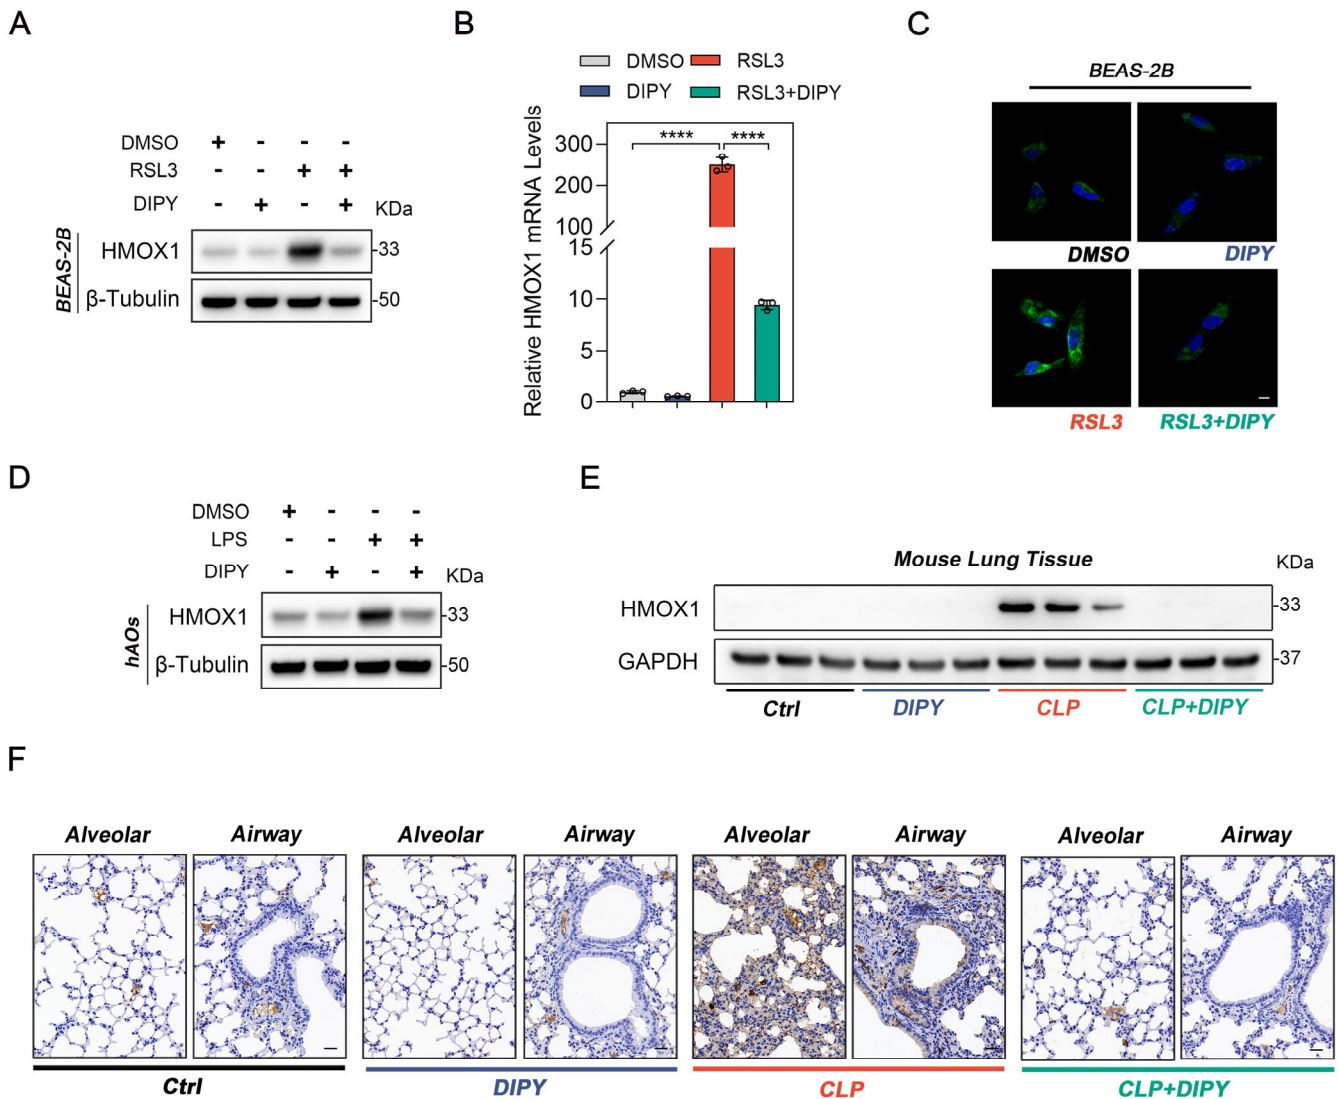

**Figure. S5 Validation of HMOX1 as a target of DIPY.**

(A-C) BEAS-2B cells were treated with RSL3, DIPY, or RSL3 plus DIPY for 8 h as shown in Figure S1 (n = 3 per group). The expression of the HMOX1 was detected by western blot (A), qRT-PCR (B), and IF staining (C). Scale bar, 10  $\mu$ m. (D) hAOs were treated with LPS, DIPY, and LPS with DIPY for 24 h as shown in Figure S4, and the protein levels of HMOX1 were analyzed by western blot (n = 5 per group). (E and F) The expression of HMOX1 in CLP-induced sepsis mouse models with or without DIPY treatment was detected by western blot (E) and IHC (F) assays (n = 6 per group). Scale bar, 50  $\mu$ m. Results are shown as mean  $\pm$  SD of 3-6 independent experiments. Statistical significance is indicated as \*\*\*\* $P$  < 0.0001.

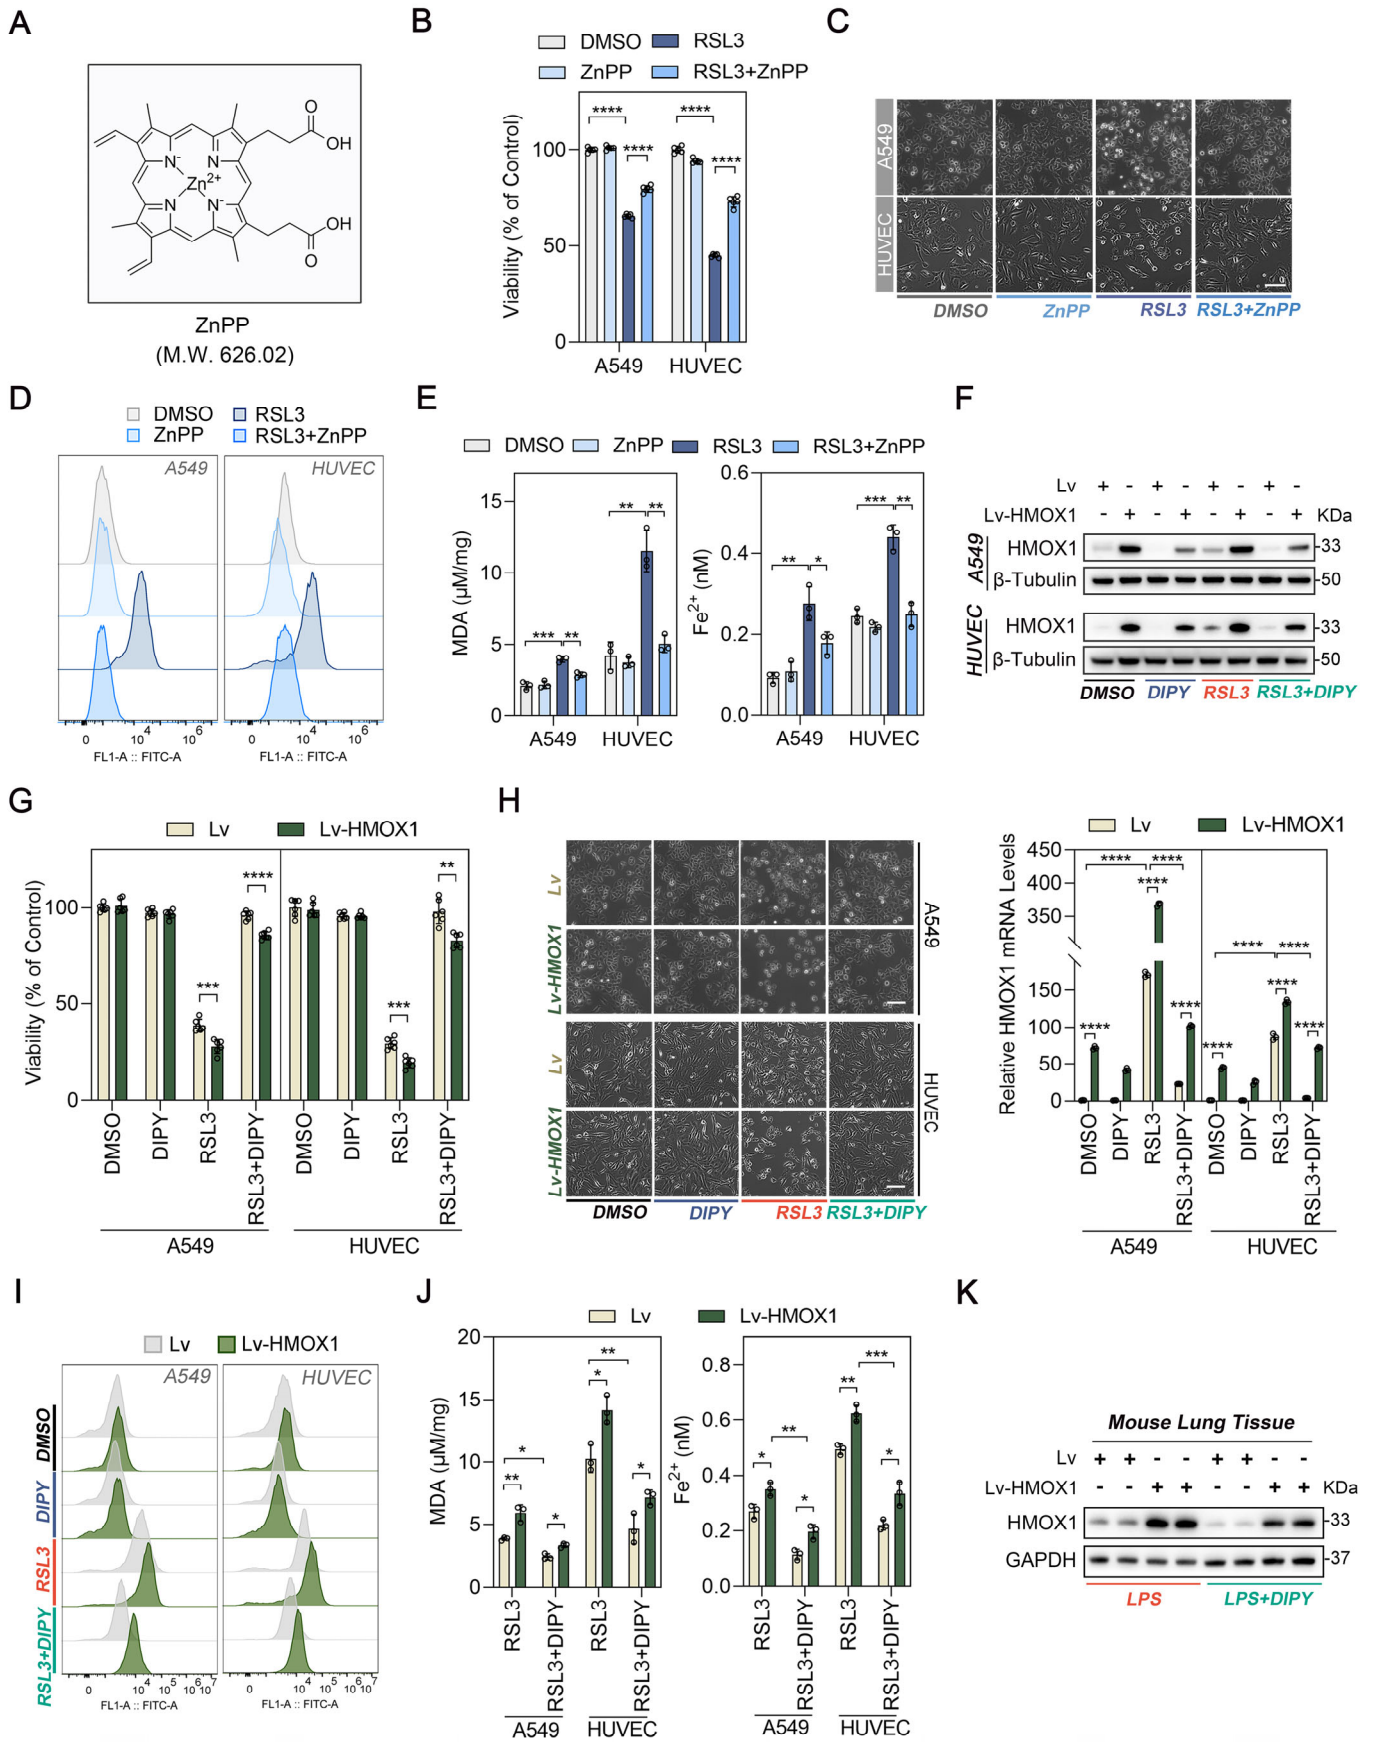

**Figure. S6 DIPY inhibits ferroptosis by downregulating HMOX1.**

(A) The chemical structure of ZnPP is shown. (B-E) A549 were treated with RSL3 (5  $\mu$ M), ZnPP (5  $\mu$ M), and RSL3 (5  $\mu$ M) plus ZnPP (5  $\mu$ M) for 8 h (n = 3 per group). HUVEC cells were treated with RSL3 (0.25  $\mu$ M), ZnPP (5  $\mu$ M), and RSL3 (0.25  $\mu$ M) plus ZnPP (5  $\mu$ M) for 8 h (n = 3 per group). Cell viability was assessed (B). Representative phase-contrast images of cells (C). Scale bar, 100  $\mu$ m. Measurement of L-ROS levels (D). Measurement of MDA contents and Fe<sup>2+</sup> levels (E). (F-J) A549 and HUVEC cells were infected with Lv-HMOX1 or Lv. Lv-HMOX1 and Lv A549 cells were treated by RSL3 (5  $\mu$ M), DIPY (10  $\mu$ M), and RSL3 (5  $\mu$ M) plus DIPY (10  $\mu$ M; n = 3 per group). Lv-HMOX1 and Lv HUVEC cells were treated by RSL3 (0.25  $\mu$ M), DIPY (5  $\mu$ M), and RSL3 (0.25  $\mu$ M) plus DIPY (5  $\mu$ M; n = 3 per group). The expression of HMOX1 was confirmed by western blot (upper panel of F) and qRT-PCR (lower panel of F). Cell viability assessment (G). Representative phase-contrast images of cells (H). Scale bar, 100  $\mu$ m. Measurement of L-ROS levels (I). MDA contents and Fe<sup>2+</sup> levels (J). (K) C57/BL6 mice were administered Lv-HMOX1 or Lv via intratracheal instillation for 7 days. On day 8, the indicated mice were challenged with LPS (2.5 mg/kg) with or without DIPY pretreatment as described in Figure 5I-M. The expression of HMOX1 was detected by western blot (n = 6 per group). Results are shown as mean  $\pm$  SD of at least 3 independent experiments. Statistical significance is indicated as \**P* < 0.05; \*\**P* < 0.01; \*\*\**P* < 0.001; \*\*\*\**P* < 0.0001.

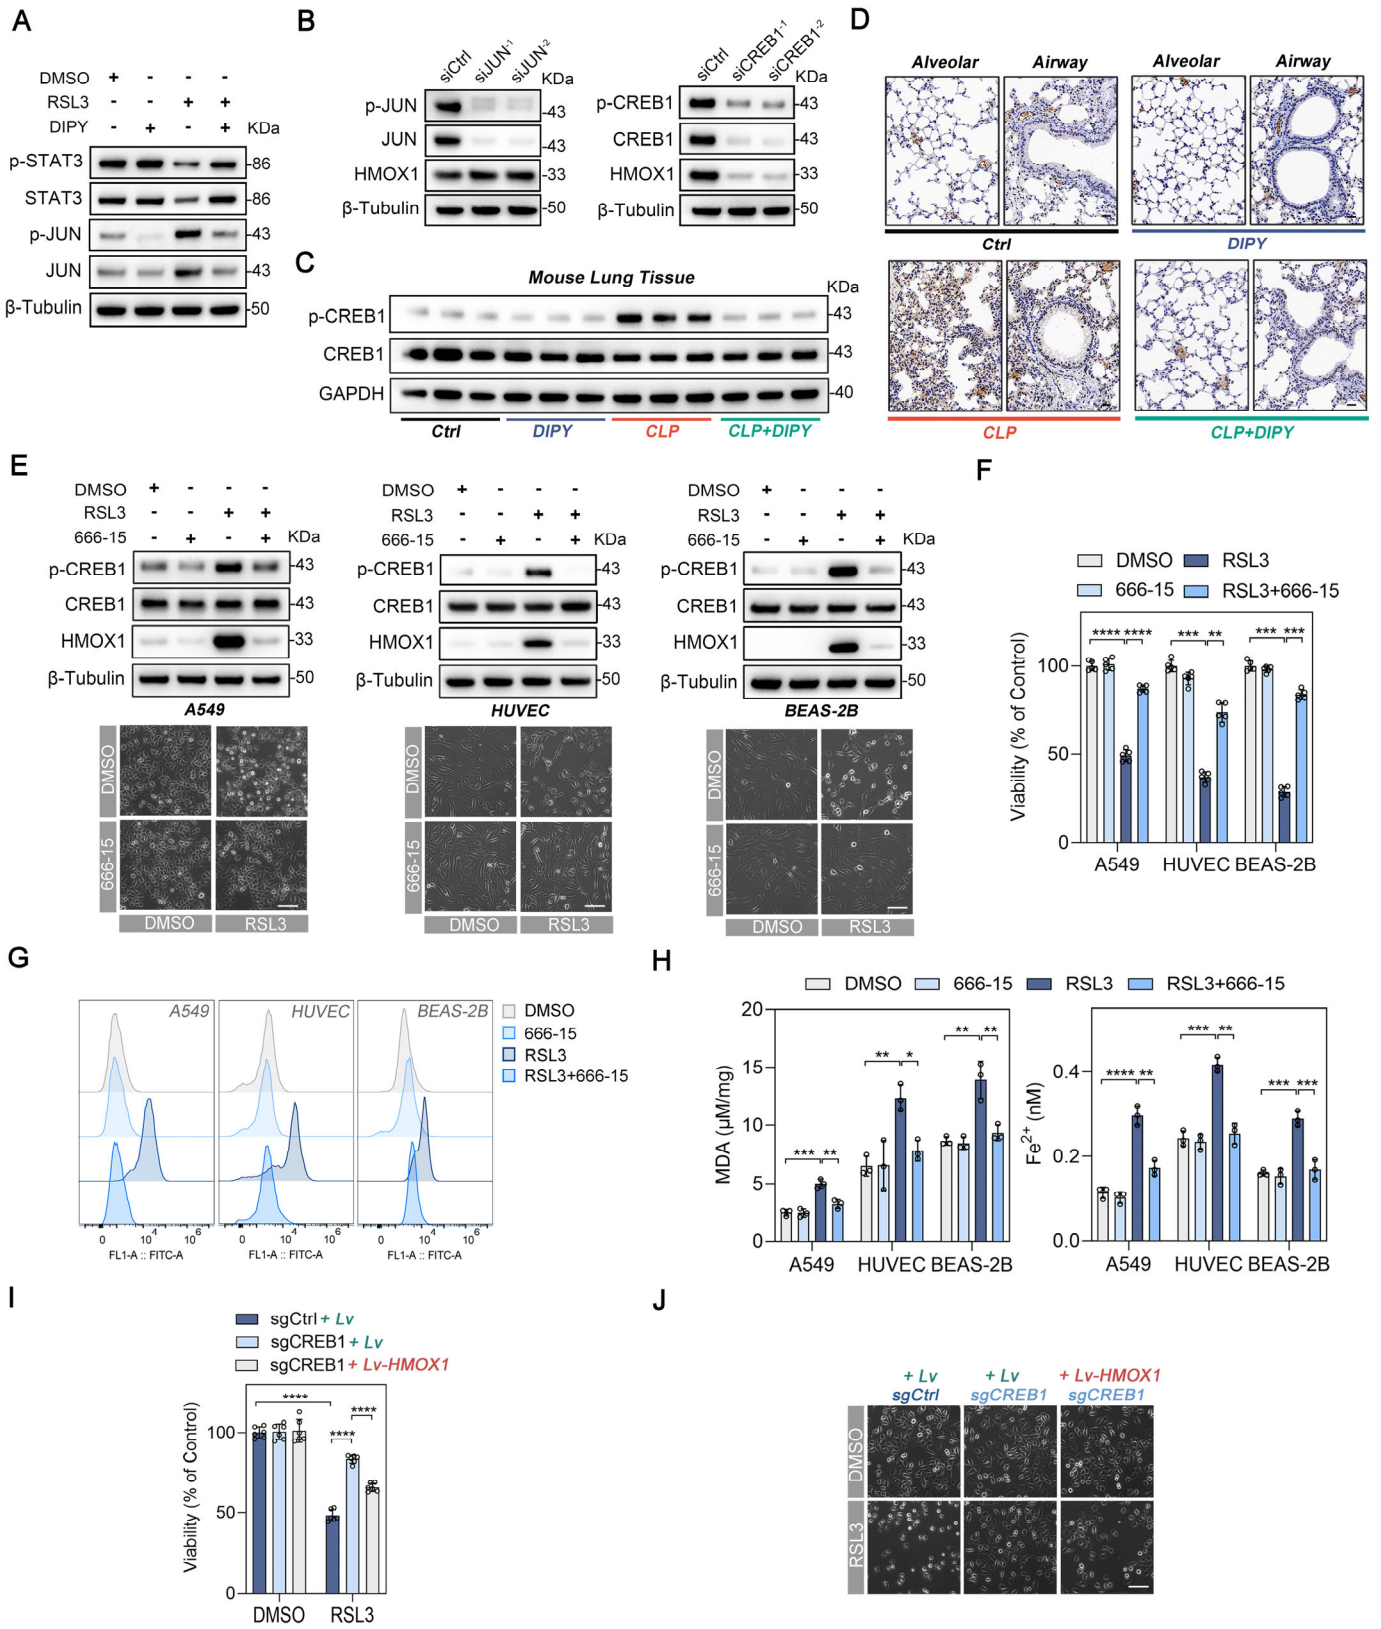

**Figure. S7 DIPY inhibits HMOX1 by deactivating CREB1.**

(A) A549 cells were treated with RSL3, DIPY, and RSL3 with DIPY for 8 h as shown in Figure 1. Cell lysates were then subjected to immunoblotting with the indicated antibodies. (B) A549 were transfected with JUN siRNAs (siJUN<sup>-1</sup>, siJUN<sup>-2</sup>), CREB1 siRNAs (siCREB1<sup>-1</sup> and siCREB1<sup>-2</sup>), or control siRNA (siCtrl) for 48 h. Cell lysates were subjected to immunoblotting with the indicated antibodies. (C-D) Western blot assays (C) and IHC assays (D) examined the expression of p-CREB1 in CLP-induced sepsis mouse models with or without DIPY treatment as shown in Figure S3 (n = 6 per group). Scale bar, 100  $\mu$ m. (E-H) A549, HUVEC, and BEAS-2B cells were treated by RSL3 (5  $\mu$ M for A549, 0.25  $\mu$ M for HUVEC, and 1  $\mu$ M for BEAS-2B), 666-15 (1  $\mu$ M), and RSL3 (5  $\mu$ M for A549, 0.25  $\mu$ M for HUVEC, and 1  $\mu$ M for BEAS-2B) with 666-15 (1  $\mu$ M) for 8 h. Cell lysates were subjected to immunoblotting with the indicated antibodies (up panels of E). Representative phase-contrast images of cells (lower panels of E). Scale bar: 100  $\mu$ m. Cell viability assessment (F). Measurement of L-ROS levels (G). Determination of MDA contents and Fe<sup>2+</sup> levels (H). (I-J) sgCREB1 A549 cells or the control cells were infected with lentiviruses carrying Lv-HMOX1 or Lv and then treated with RSL3 as shown in Figure 6. Cell viability assessment (I). Representative phase-contrast images of indicated cells (J). Scale bar, 100  $\mu$ m. Results are shown as mean  $\pm$  SD of 3-6 independent experiments. Statistical significance is indicated as \**P* < 0.05; \*\**P* < 0.01; \*\*\**P* < 0.001; \*\*\*\**P* < 0.0001.



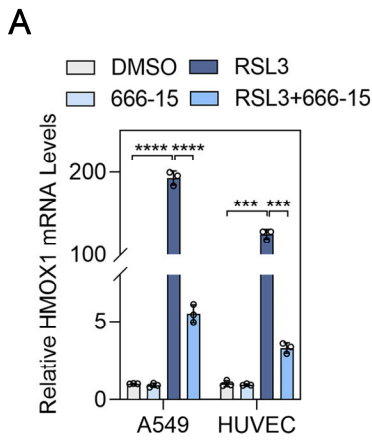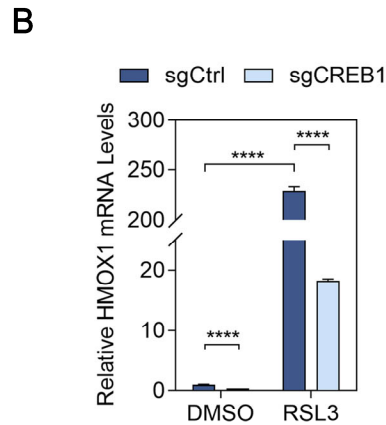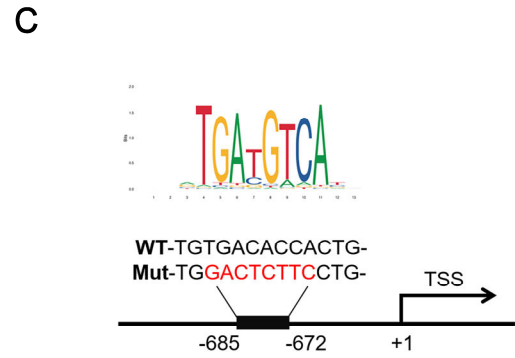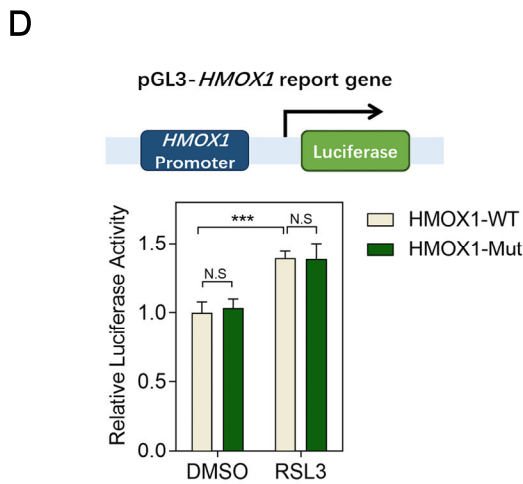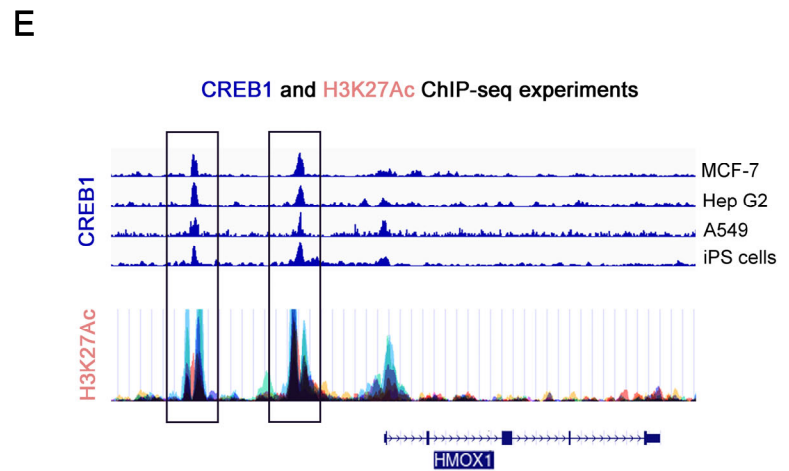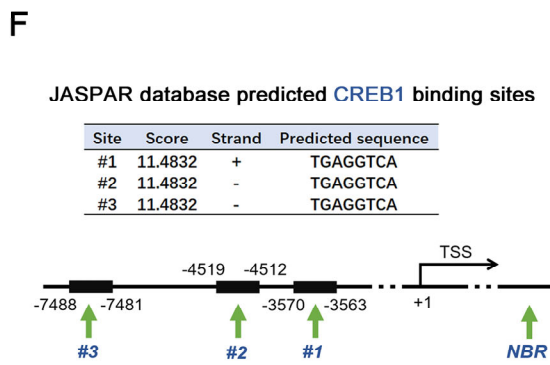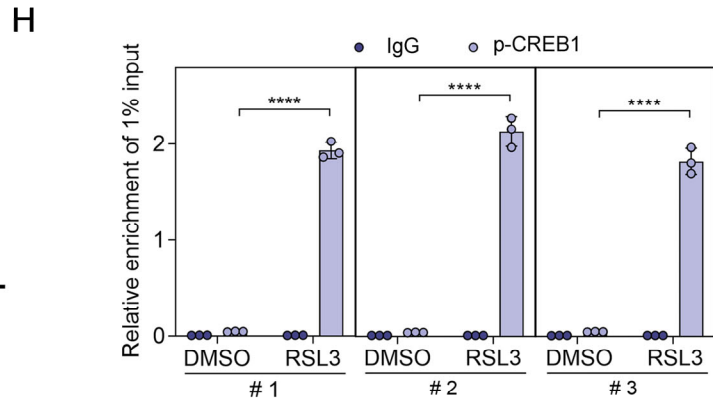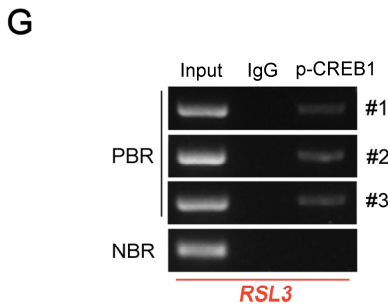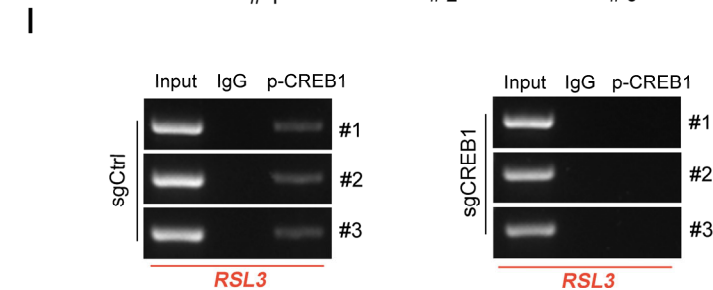

**Figure. S8 CREB1 transcriptionally upregulates the expression of HMOX1 through binding to the enhancers.**

(A) A549 and HUVEC cells were treated with RSL3, 666-15, and RSL3 plus 666-15 for 8 h as shown in Figure S7. Total RNA was extracted, and qRT-PCR was performed to detect the mRNA levels of HMOX1. (B) sgCREB1 A549 cells were treated with RSL3 for 8 h as shown in Figure 6. The level of HMOX1 mRNA was analyzed by qRT-PCR. (C) Schematic representation of the putative CREB1-binding site in the promoter of the human *HMOX1* gene. (D) The human *HMOX1* promoter regions (-847 to +65), with or without the putative CREB1-binding motif mutation, were cloned into pGL3-basic reporter plasmids and transfected into A549 cells for 24 h. These cells were treated with RSL3 (5  $\mu$ M) or DMSO for 8 h, and the relative luciferase activity was determined. (E) Analysis of CREB1-binding peaks (upper panel) and the active enhancer marker H3K27Ac peaks (lower panel) upstream of the *HMOX1* promoter using ChIP-Atlas and ENCODE databases. (F) Prediction of CREB1 binding sites in the regions around the CREB1-binding peaks shown in E using the JASPAR database. (G) A549 cells were treated with RSL3 (5  $\mu$ M) for 8 h. Analysis of the enrichment of CREB1 in the three potential CREB1-binding sites by ChIP-PCR assay. (H) A549 cells were subjected to ChIP analysis with antibodies to p-CREB1 or control rabbit IgG. qRT-PCR was performed to amplify regions surrounding the putative CREB1 binding sites (#1, #2, and #3). Data are plotted as the ratio of immunoprecipitated DNA to total input DNA. (I) The sgCREB1 and sgCtrl A549 cells were treated with RSL3 (5  $\mu$ M), and the enrichment of CREB1 in the three sites was analyzed by ChIP-PCR assay. Results are shown as mean  $\pm$  SD of 3 independent experiments. Statistical significance is indicated as \*\*\* $P$  < 0.001; \*\*\*\* $P$  < 0.0001; N.S. not significant.

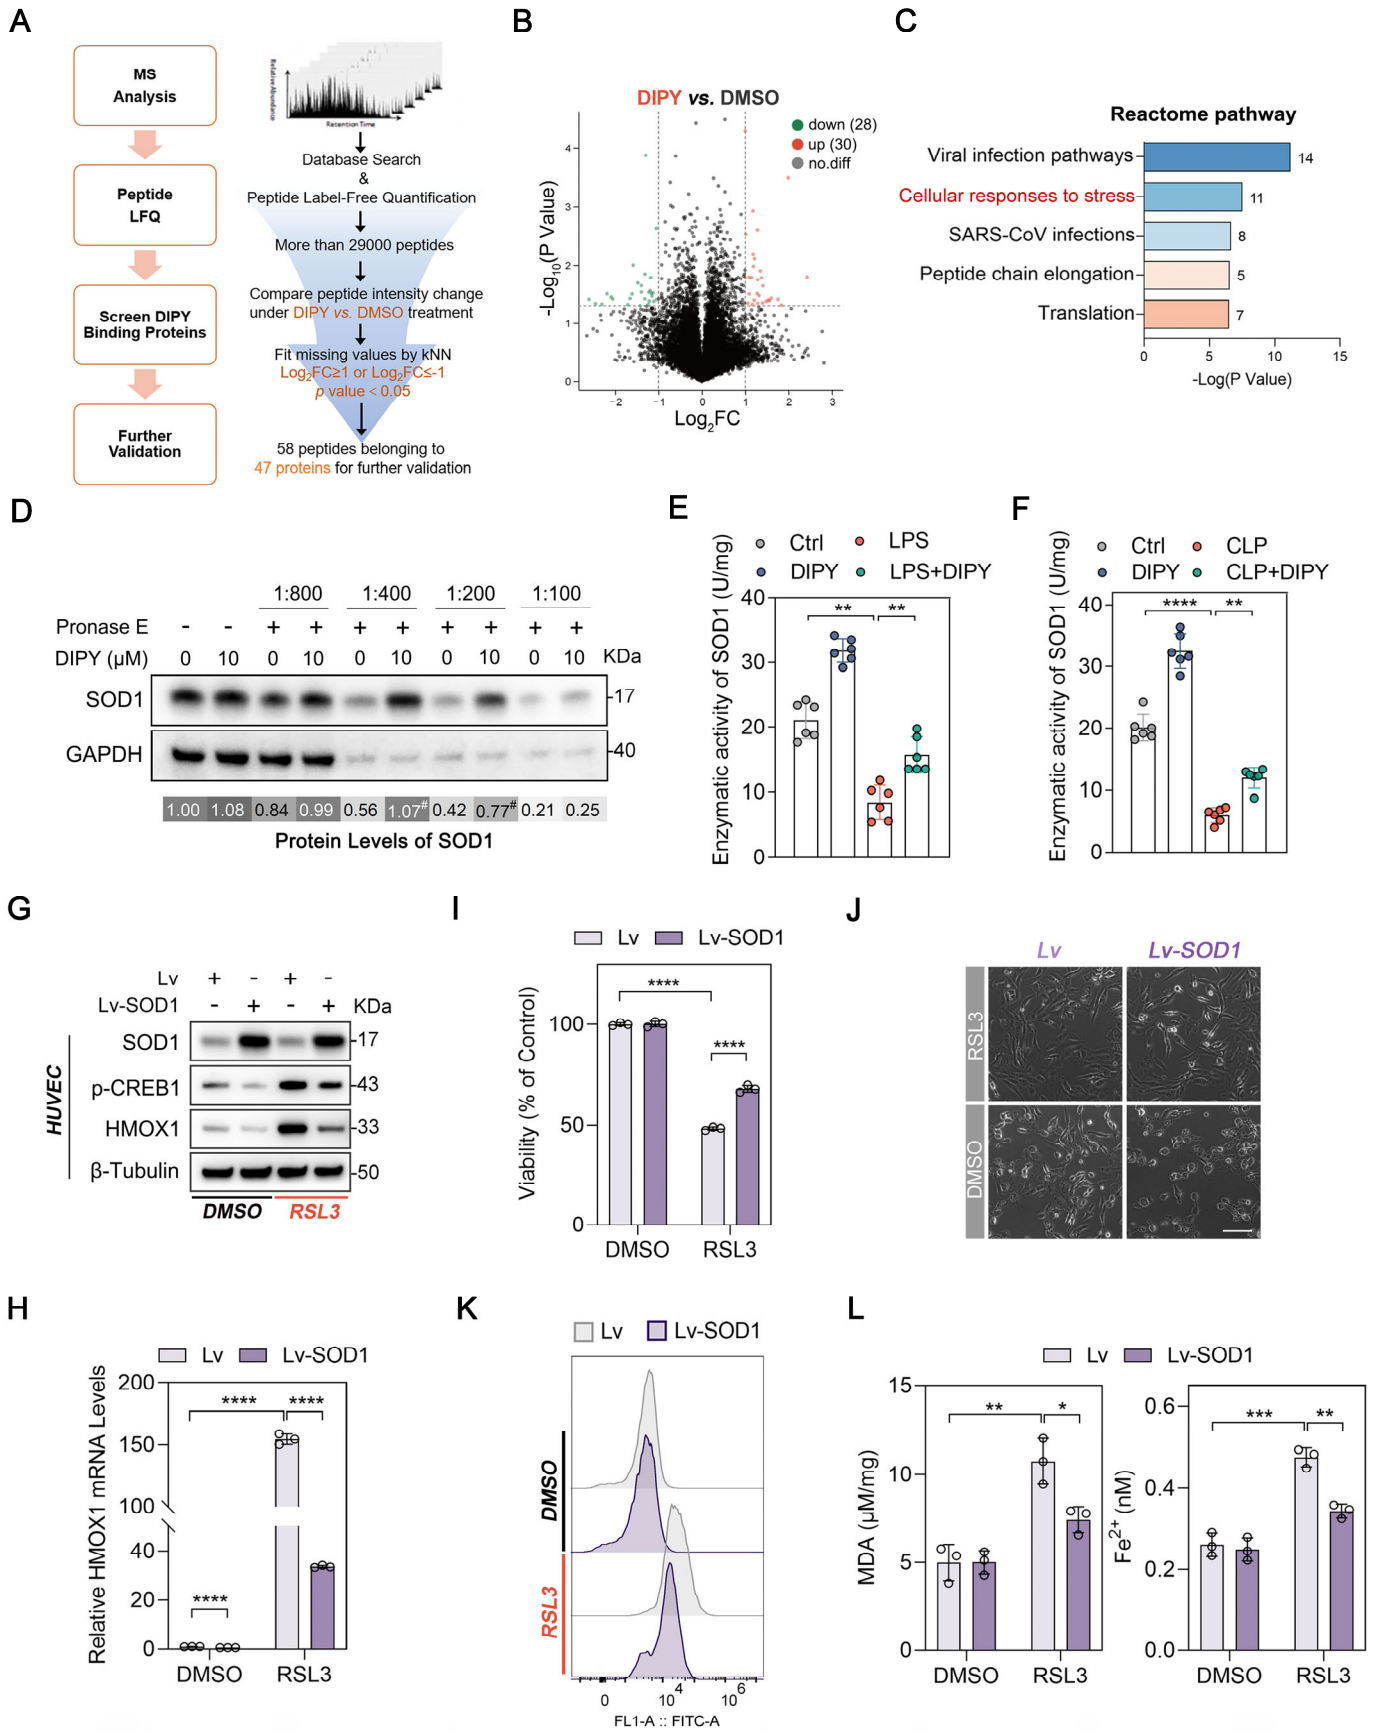



**Figure. S9 DIPY suppresses the CREB1/HMOX1 pathway by directly binding to and activating SOD1.**

(A) Computational pipeline for screening of peptides corresponding to DIPY binding proteins. (B) Visualization of LiP-MS assay results using volcano plots. (C) Reactome pathway analysis of candidate DIPY target proteins identified by the LiP-MS assay. (D) Verification of SOD1 as a target of DIPY using the DARTS assay. (E) Enzymatic activity of SOD1 in LPS-induced ALI mouse models with or without DIPY treatment. (F) Enzymatic activity of SOD1 in CLP-induced sepsis mouse models with or without DIPY treatment. (G-L) HUVEC cells were infected with lentivirus harboring a vector encoding SOD1 (Lv-SOD1) or the empty vector (Lv). The indicated cells were treated with or without RSL3 (0.25  $\mu$ M). Cell lysates were subjected to immunoblotting with the indicated antibodies (G). The expression of HMOX1 mRNA was analyzed using qRT-PCR (H). Assessment of cell viability (I). Representative phase-contrast images of cells (J). Scale bar, 100  $\mu$ m. Measurement of L-ROS levels (K). Determination of MDA contents and Fe<sup>2+</sup> levels (L). Results are shown as mean  $\pm$  SD of 3-6 independent experiments. Statistical significance is indicated as \* $P$  < 0.05; \*\* $P$  < 0.01; \*\*\* $P$  < 0.001; \*\*\*\* $P$  < 0.0001.

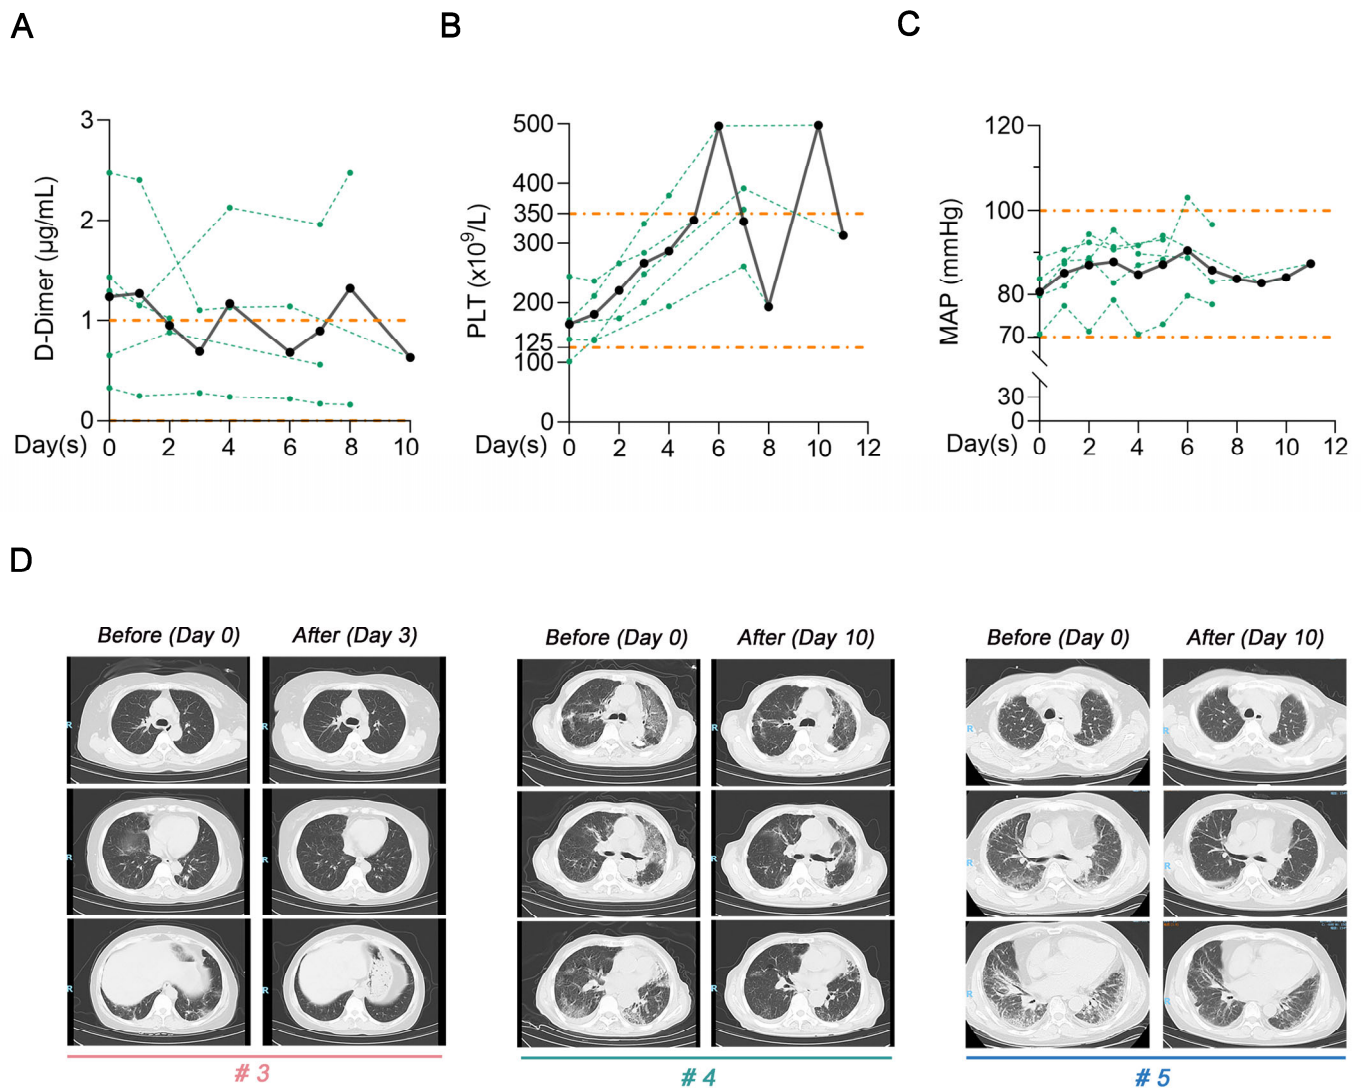

**Figure. S10 Coagulation function, MAP, and chest CT of subjects after DIPY treatment.**

(A) D-Dimer levels at indicated time points before and after DIPY treatment. (B) Peripheral blood platelet counts at indicated time points before and after DIPY treatment. (C) The mean arterial pressure (MAP) at indicated time points before and after DIPY treatment. (A-C) Data is shown with individual patient responses as dotted lines and the mean of all subjects as solid lines. (D) Chest computed tomography scans of three patients (#3, #4, and #5) before DIPY treatment (Day 0) and after DIPY treatment (Day 3 or 10).

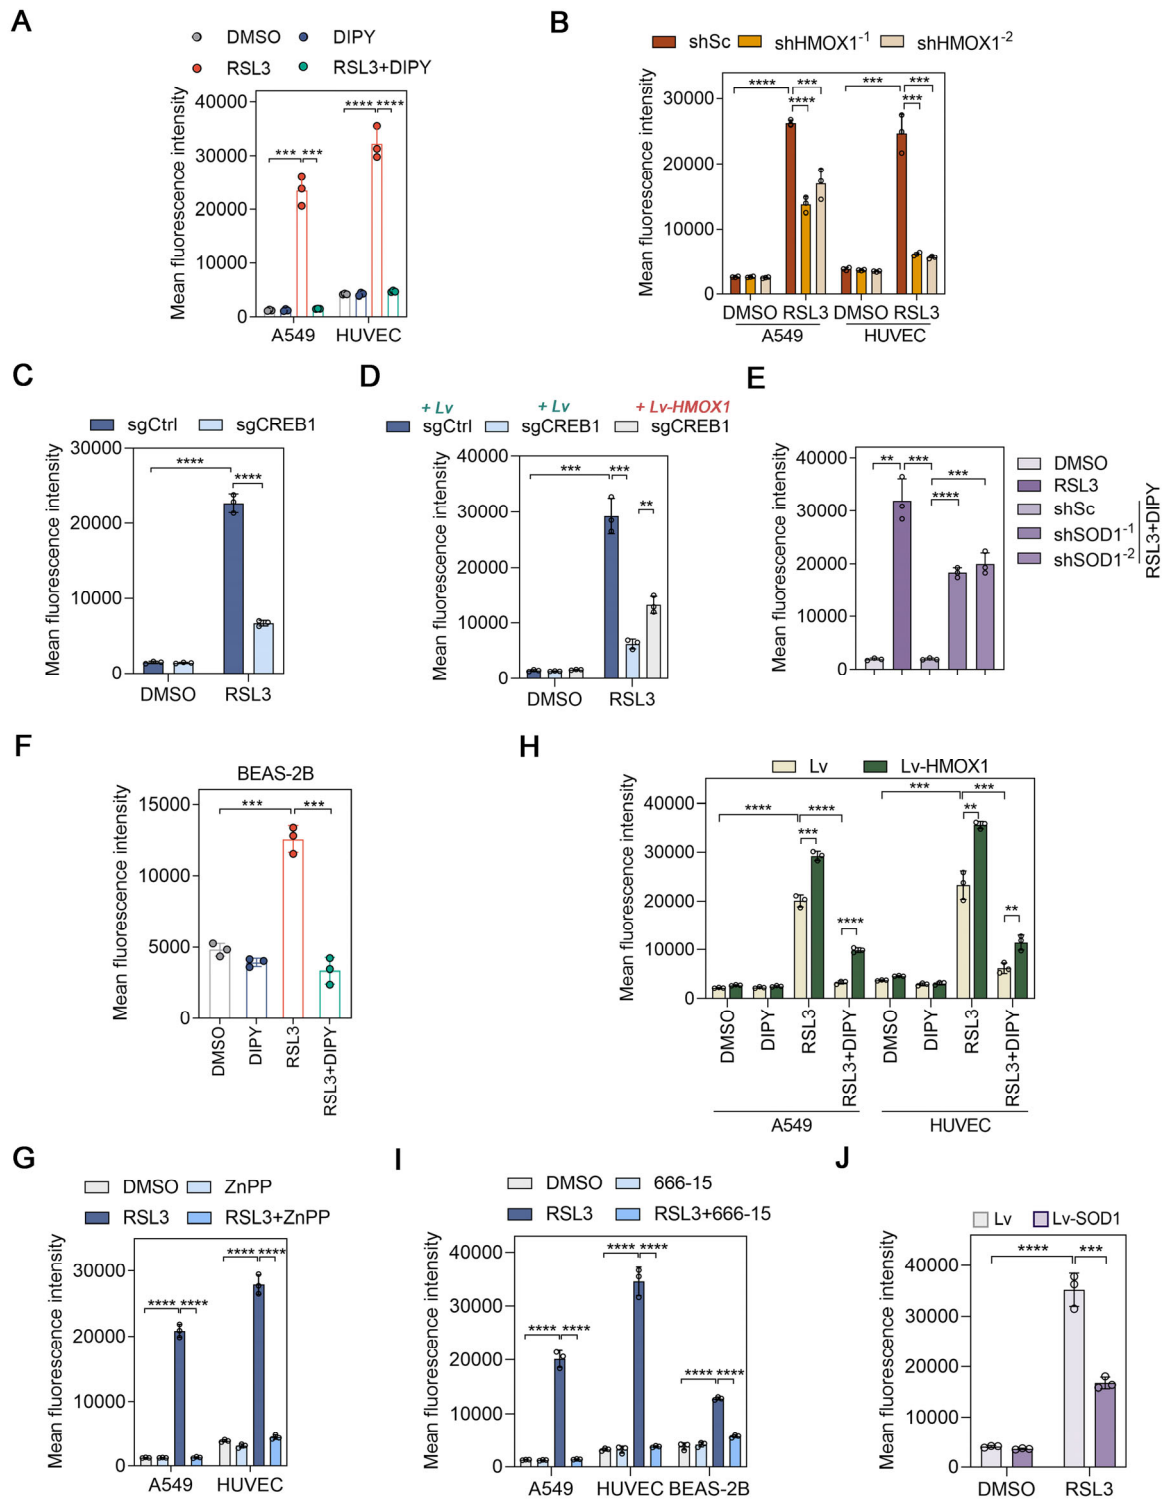

**Figure. S11 The quantification analysis of the flow cytometric assays.**

(A-J) The quantitative analysis results of flow cytometric assays in Figures 1G, 5D, 6J, 6M, and 7K, and Supplemental Figures S1D, S6D, S6I, S7G, and S9K are presented in A, B, C, D, E, F, G, H, I, and J respectively.

**Table. S1 Identified three TF candidates for the human *HMOX1* gene.**

| TFs predicated by four TF databases <sup>A</sup> (14) | TFs analyzed by Metascape <sup>B</sup> (20) | TFs candidates for <i>HMOX1</i> (3) |
|-------------------------------------------------------|---------------------------------------------|-------------------------------------|
| STAT1                                                 | ETS1                                        | CREB1                               |
| STAT3                                                 | HIF1A                                       | STAT3                               |
| KLF9                                                  | NFKB1                                       | JUN                                 |
| TEAD4                                                 | SP1                                         |                                     |
| MYC                                                   | RELA                                        |                                     |
| TFAP2C                                                | HSF1                                        |                                     |
| JUN                                                   | JUN                                         |                                     |
| CTCF                                                  | JUND                                        |                                     |
| GATA2                                                 | PPARA                                       |                                     |
| YY1                                                   | PPARG                                       |                                     |
| FOXA1                                                 | FLI1                                        |                                     |
| AR                                                    | TFAP2A                                      |                                     |
| CREB1                                                 | STAT3                                       |                                     |
| MAZ                                                   | SP3                                         |                                     |
|                                                       | SREBF1                                      |                                     |
|                                                       | CREB1                                       |                                     |
|                                                       | ETV4                                        |                                     |
|                                                       | VDR                                         |                                     |
|                                                       | SIRT1                                       |                                     |
|                                                       | KLF6                                        |                                     |

<sup>A</sup> The filter criteria for four transcription factor prediction databases:

**JASPAR:** The relative profile score threshold was 85%, and scores > 10.

**hTFtarget:** Default options.

**KnockTF:** Fold change > 1.5.

**ChIPBase:** Regulatory domain is [-5 kb, 1 kb] (motif: N).

<sup>B</sup> **Metascape:** Default parameters,  $P < 0.001$ .

**Table. S2 The results of LiP-MS assay (58 peptides corresponding to 47 proteins).**

| <b>Protein ID</b> | <b>Gene</b> | <b>Protein Description</b>                               | <b>LogFC</b> | <b>P value</b> | <b>sig</b> | <b>Differential Peptides</b> |
|-------------------|-------------|----------------------------------------------------------|--------------|----------------|------------|------------------------------|
| P00441            | SOD1        | Superoxide dismutase [Cu-Zn]                             | 1.757941     | 0.039264       | 1          | 3                            |
| P04179            | SOD2        | Superoxide dismutase [Mn],<br>mitochondrial              | -2.18504     | 0.031462       | -1         | 3                            |
| P13639            | EEF2        | Elongation factor 2                                      | 1.192139     | 0.010485       | 1          | 3                            |
| P05023            | ATP1A1      | Sodium/potassium-transporting<br>ATPase subunit alpha-1  | 1.207645     | 0.040379       | 1          | 2                            |
| P05556            | ITGB1       | Integrin beta-1                                          | -1.3916      | 0.029395       | -1         | 2                            |
| P49327            | FASN        | Fatty acid synthase                                      | 1.350013     | 0.012567       | 1          | 2                            |
| P62805            | H4C1        | Histone H4                                               | -1.70587     | 0.047864       | -1         | 2                            |
| P99999            | CYCS        | Cytochrome c                                             | 1.216416     | 0.007796       | 1          | 2                            |
| O00469            | PLOD2       | Procollagen-lysine, 2-<br>oxoglutarate 5-dioxygenase 2   | -1.14951     | 0.034489       | -1         | 1                            |
| O15372            | EIF3H       | Eukaryotic translation initiation<br>factor 3 subunit H  | -1.04881     | 0.002325       | -1         | 1                            |
| O60814            | H2BC12      | Histone H2B type 1-K                                     | -2.45322     | 0.046175       | -1         | 1                            |
| P00403            | MT-CO2      | Cytochrome c oxidase subunit 2                           | 1.005477     | 0.016238       | 1          | 1                            |
| P01889            | HLA-B       | HLA class I histocompatibility<br>antigen, B alpha chain | 1.31956      | 0.033705       | 1          | 1                            |
| P04004            | VTN         | Vitronectin                                              | -1.31372     | 0.038486       | -1         | 1                            |
| P04183            | TK1         | Thymidine kinase, cytosolic                              | -1.39406     | 0.022726       | -1         | 1                            |
| P06744            | GPI         | Glucose-6-phosphate isomerase                            | -1.10411     | 0.042158       | -1         | 1                            |
| P06748            | NPM1        | Nucleophosmin                                            | 1.605        | 0.037427       | 1          | 1                            |
| P07355            | ANXA2       | Annexin A2                                               | -2.0903      | 0.035699       | -1         | 1                            |
| P14618            | PKM         | Pyruvate kinase PKM                                      | -1.16427     | 0.031092       | -1         | 1                            |

|        |         |                                                         |          |          |    |   |
|--------|---------|---------------------------------------------------------|----------|----------|----|---|
| P16435 | POR     | NADPH-cytochrome P450 reductase                         | -1.30951 | 0.014312 | -1 | 1 |
| P17813 | ENG     | Endoglin                                                | -1.5821  | 0.009999 | -1 | 1 |
| P20618 | PSMB1   | Proteasome subunit beta type-1                          | -1.41923 | 0.049924 | -1 | 1 |
| P22314 | UBA1    | Ubiquitin-like modifier-activating enzyme 1             | 1.093167 | 0.016195 | 1  | 1 |
| P26006 | ITGA3   | Integrin alpha-3                                        | 1.561683 | 0.040939 | 1  | 1 |
| P27635 | RPL10   | Large ribosomal subunit protein uL16                    | 1.184193 | 0.006612 | 1  | 1 |
| P29317 | EPHA2   | Ephrin type-A receptor 2                                | 1.14719  | 0.016357 | 1  | 1 |
| P35268 | RPL22   | Large ribosomal subunit protein eL22                    | 1.412971 | 0.022976 | 1  | 1 |
| P43490 | NAMPT   | Nicotinamide phosphoribosyltransferase                  | 1.994798 | 0.000324 | 1  | 1 |
| P51571 | SSR4    | Translocon-associated protein subunit delta             | -1.23528 | 0.047331 | -1 | 1 |
| P53396 | ACLY    | ATP-citrate synthase                                    | 1.288085 | 0.045699 | 1  | 1 |
| P55145 | MANF    | Mesencephalic astrocyte-derived neurotrophic factor     | -1.21195 | 0.041896 | -1 | 1 |
| P60903 | S100A10 | Protein S100-A10                                        | -1.21966 | 0.029774 | -1 | 1 |
| P61769 | B2M     | Beta-2-microglobulin                                    | 1.377048 | 0.016606 | 1  | 1 |
| P62269 | RPS18   | Small ribosomal subunit protein uS13                    | -2.60091 | 0.039184 | -1 | 1 |
| P62316 | SNRPD2  | Small nuclear ribonucleoprotein Sm D2                   | -2.05467 | 0.038768 | -1 | 1 |
| P68032 | ACTC1   | Actin, alpha cardiac muscle 1                           | -1.17789 | 0.016415 | -1 | 1 |
| P80723 | BASP1   | Brain acid soluble protein 1                            | -1.47545 | 0.020415 | -1 | 1 |
| P83111 | LACTB   | Serine beta-lactamase-like protein LACTB, mitochondrial | 2.429089 | 0.016153 | 1  | 1 |

|        |         |                                             |          |          |    |   |
|--------|---------|---------------------------------------------|----------|----------|----|---|
| Q01780 | EXOSC10 | Exosome component 10                        | -2.3035  | 0.047053 | -1 | 1 |
| Q02878 | RPL6    | Large ribosomal subunit protein<br>eL6      | 1.838028 | 0.048915 | 1  | 1 |
| Q13724 | MOGS    | Mannosyl-oligosaccharide<br>glucosidase     | 1.166198 | 0.047663 | 1  | 1 |
| Q14192 | FHL2    | Four and a half LIM domains<br>protein 2    | -1.65314 | 0.037883 | -1 | 1 |
| Q15393 | SF3B3   | Splicing factor 3B subunit 3                | 1.285144 | 0.002469 | 1  | 1 |
| Q15942 | ZYX     | Zyxin                                       | 1.276395 | 0.031141 | 1  | 1 |
| Q9NZM1 | MYOF    | Myoferlin                                   | 1.002151 | 5.22E-05 | 1  | 1 |
| Q9UJZ1 | STOML2  | Stomatin-like protein 2,<br>mitochondrial   | -1.03778 | 0.039183 | -1 | 1 |
| Q9UK76 | JPT1    | Jupiter microtubule associated<br>homolog 1 | 1.062238 | 0.045057 | 1  | 1 |

---

**Table. S3 Reactome pathway analysis of the different peptides listed in Table S2.**

| Description                         | Gene Ratio      | Counts | LogP         | Log(q-value) | Symbols                                                                                       |
|-------------------------------------|-----------------|--------|--------------|--------------|-----------------------------------------------------------------------------------------------|
| Viral Infection Pathways            | 0.01825<br>2934 | 14     | -11.20475564 | -6.860225827 | ATP1A1, B2M, HLA-B, ITGB1, NPM1, PSMB1, RPL6, RPL10, RPL22, RPL18, SNRPD2, MOGS, H4C9, H2BC12 |
| <b>Cellular responses to stress</b> | 0.01376<br>721  | 11     | -7.5314894   | -3.664080816 | COX2, PSMB1, RPL6, RPL10, RPL22, RPS18, SOD1, SOD2, H4C9, CYCS, H2BC12                        |
| SARS-CoV Infections                 | 0.01932<br>3671 | 8      | -6.64888503  | -3.102228908 | ATP1A1, B2M, HLA-B, ITGB1, NPM1, RPS18, SNRPD2, MOGS                                          |
| Peptide chain elongation            | 0.05555<br>5556 | 5      | -6.54130067  | -3.102228908 | EEF2, RPL6, RPL10, RPL22, RPS18                                                               |
| Translation                         | 0.02397<br>26   | 7      | -6.48762663  | -3.102228908 | EEF2, RPL6, RPL10, RPL22, RPS18, SSR4, EIF3H                                                  |



**Table. S4 Baseline information of 5 enrolled ARDS patients.**

| No.        | Gender | Age | Causes of ARDS         | Other respiratory diseases            | Exposure to COVID-19 |
|------------|--------|-----|------------------------|---------------------------------------|----------------------|
| Patient #1 | Male   | 57  | Pneumonia              | No                                    | Yes                  |
| Patient #2 | Male   | 60  | Pneumonia              | Fungal pneumonia                      | No                   |
| Patient #3 | Female | 56  | Pneumonia              | No                                    | No                   |
| Patient #4 | Male   | 87  | Pneumonia              | Chronic obstructive pulmonary disease | No                   |
| Patient #5 | Male   | 60  | Interstitial pneumonia | No                                    | No                   |

**Table. S5 Antibodies used in this study.**

| Antibody         | Sources                                 | Applications                                    |
|------------------|-----------------------------------------|-------------------------------------------------|
| ACCTUB           | Santa Cruz<br>(Cat#Sc-23950)            | 1:50 for IF                                     |
| ACSL4            | Proteintech<br>(Cat#22401-1-AP)         | 1:1000 for WB                                   |
| $\beta$ -Tubulin | Cell Signaling Technology<br>(Cat#2146) | 1:1000 for WB                                   |
| CREB1            | Cell Signaling Technology<br>(Cat#9197) | 1:1000 for WB                                   |
| FTH1             | Abclonal<br>(Cat#A19544)                | 1:1000 for WB                                   |
| GAPDH            | Cell Signaling Technology<br>(Cat#5174) | 1:1000 for WB                                   |
| GPX4             | Abcam<br>(Cat#ab125066)                 | 1:5000 for WB                                   |
| HMOX1            | Abcam<br>(Cat#ab189491)                 | 1:1000 for WB; 1:250 for IF;<br>1:10000 for IHC |
| JUN              | Cell Signaling Technology<br>(Cat#9165) | 1:1000 for WB                                   |
| MUC5AC           | Absin<br>(Cat#abs126767)                | 1:50 for IF                                     |
| p-CREB1 (Ser133) | Cell Signaling Technology<br>(Cat#9198) | 1:500 for WB; 1:400 for IHC;<br>1:25 for ChIP   |
| p-JUN (Ser73)    | Cell Signaling Technology<br>(Cat#3270) | 1:1000 for WB                                   |
| p-STAT3 (Tyr705) | Cell Signaling Technology<br>(Cat#9145) | 1:1000 for WB                                   |

|         |                                         |               |
|---------|-----------------------------------------|---------------|
| SLC7A11 | Abcam<br>(Cat#ab175186)                 | 1:1000 for WB |
| SOD1    | Proteintech<br>(Cat#10269-1-AP)         | 1:5000 for WB |
| STAT3   | Cell Signaling Technology<br>(Cat#9139) | 1:1000 for WB |

---

**Table. S6 Clinical characteristics of patient-derived hAOs.**

| <b>No.</b> | <b>Gender</b> | <b>Age</b> | <b>Cancer type</b>           | <b>TNM stage</b> |
|------------|---------------|------------|------------------------------|------------------|
| Patient #1 | Male          | 74         | Lung squamous cell carcinoma | T3 N2 M0         |
| Patient #2 | Male          | 56         | Lung adenocarcinoma          | T4 N2 M0         |

**Table. S7 Airway organoids medium recipes used in this study.**

| <b>Medium component</b> | <b>Final concentration</b> | <b>Sources</b> | <b>Cat.</b> |
|-------------------------|----------------------------|----------------|-------------|
| Advanced DMEM/F12       | 1×                         | Invitrogen     | #12634-034  |
| A8301                   | 500 nM                     | Tocris         | #2939       |
| B27 supplement          | 1×                         | Gibco          | #17504-44   |
| EGF-7                   | 25 ng/mL                   | Peprtech       | #100-19     |
| EGF-10                  | 100 ng/mL                  | Peprtech       | #100-26     |
| N-Acetylcysteine        | 1.25 mM                    | Sigma          | #A9165-5g   |
| Nicotinamide            | 5 mM                       | Sigma          | #N0636      |
| Noggin                  | 100 ng/mL                  | Peprtech       | #120-10C    |
| Primocin                | 50 µg/mL                   | Invitrogen     | #Ant-pm-1   |
| R-Spondin               | 500 ng/mL                  | Peprtech       | #120-38     |
| SB202190                | 500 nM                     | Sigma          | #S7067      |
| Y-27632                 | 5 µM                       | Abmole         | #M20999     |

**Table. S8 Targeting sequences for siRNAs, shRNAs, and sgRNA used in this study.**

| Notes                 | Sequences (5'-3')     |
|-----------------------|-----------------------|
| siJUN <sup>-1</sup>   | GGATCAAGGCGGAGAGGAA   |
| siJUN <sup>-2</sup>   | CCAAGAACGTGACAGATGA   |
| siCREB1 <sup>-1</sup> | GCCACAGATTGCCACATTA   |
| siCREB1 <sup>-2</sup> | GACACATGATGGAGATGAT   |
| shHMOX1 <sup>-1</sup> | GCTGAGTTCATGAGGAACTT  |
| shHMOX1 <sup>-2</sup> | CTGTAGGGCTTTATGCCATGT |
| shSOD1 <sup>-1</sup>  | CAATGTGACTGCTGACAAA   |
| shSOD1 <sup>-2</sup>  | GTTCATGAGTTTGGAGATA   |
| sgCREB1               | GCTCGAGAGTGTCGTAGAA   |
| shSc / siCtrl         | TTCTCCGAACGTGTCACGT   |

**Table. S9 Primer sequences used for qRT-PCR in this study.**

| <b>Notes</b> | <b>Primer sequences (5'-3')</b> |
|--------------|---------------------------------|
| hHMOX1-F     | AAGACTGCGTTCCTGCTCAAC           |
| hHMOX1-R     | AAAGCCCTACAGCAACTGTCTG          |
| hAGER-F      | GTGTCCTTCCCAACGGCTC             |
| hAGER-R      | ATTGCCTGGCACCGGAAAA             |
| hSFTPD-F     | AAGCAGGGGAACATAGGACCT           |
| hSFTPD-R     | ACACCTCGCTCTCCCTTAGG            |
| hICAM1-F     | ATGCCCAGACATCTGTGTCC            |
| hICAM1-R     | GGGGTCTCTATGCCCAACAA            |
| h $\nu$ WF-F | CCGATGCAGCCTTTTCGGA             |
| h $\nu$ WF-R | TCCCCAAGATACACGGAGAGG           |
| hGAPDH-F     | CTGGGCTACACTGAGCACC             |
| hGAPDH-R     | AAGTGGTCGTTGAGGGCAATG           |

**Table. S10 The primers used to construct the reporter gene and dual-luciferase reporter assay.**

| <b>Notes</b> | <b>Forward primers (5'-3')</b> | <b>Reverse primers (5'-3')</b> |
|--------------|--------------------------------|--------------------------------|
| Wild-type    | GAAGATCTTCCCTGAATGTG           | GGGGTACCCCGGGCTCGTTCGT         |
|              | CCTGGAAGAGTGTC                 | GCTGGC                         |
| Mutated      | CTTCCTGCACCCCTCTGAGC           | AGTCCACATAAAGCAGGATGCC         |
|              | CTC                            | AG                             |



**Table S11. Primers used for the ChIP assays in this study.**

| <b>Notes</b>   | <b>Sense (5'-3')</b>    | <b>Antisense (5'-3')</b> |
|----------------|-------------------------|--------------------------|
| Site #1 (PCR)  | AGGGCAGCTTTAATGGTAGGCA  | GGGAGATGCCATGCTGCTAG     |
| Site #2 (PCR)  | GGGGTGTTTTGGCATCAGAAG   | GCAAGGAAGACAAGCCCAAGTTA  |
| Site #3 (PCR)  | CGCTCAGGCCTGTCATCCCA    | CGTGGGTGTGGGTTAGGGTGG    |
| NBR (PCR)      | AGCCACGTTTTCCCATCTG     | TCCCCACGCTGATGTTTTAAC    |
| Site #1 (qPCR) | CTGCCTCATCTCTTCTGCCTCCA | CTGGGCACGGTGGCTCATACC    |
| Site #2 (qPCR) | AAGCGATTCTCCTGCCTCAGCT  | AGCACTCTGGGAGCTGAGGTGG   |
| Site #3 (qPCR) | TCGCTCAGGCCTGTCATCCC    | ACGCAATTCTCCTACCTCAGCCTC |
